# Supplementary material
Source: publisher figshare collection journal article supplement (https://acs.figshare.com/ndownloader/files/4388785)
Supplement: Supplementary file 1 [file 4388785]

# Photo-Pens: A Simple and Versatile Tool for Maskless Photolithography

Chuanhong Zhou, Pradeep Ramiah Rajasekaran, Justin Wolff, Xuelian Li, and Punit Kohli\*

Department of Chemistry & Biochemistry

Southern Illinois University

Carbondale, IL 62901

[\\*pkohli@chem.siu.edu](mailto:*pkohli@chem.siu.edu)

**Derivation of Equation 3.** The emission intensity  $I_e$  is proportional to the fraction of the red-PDA ( $N_p$ ) in the patterns since quantum yield of the blue-PDA is negligible.<sup>[1]</sup> We have modeled the emission intensity of patterns formed in our experiments. Assuming that the total number of diacetylene monomers present is  $N_t$ , then polymerization equations can be expressed by,

$$\frac{dN_p}{dt} = \rho \dot{N}_t \quad \text{Eq. 1S}$$

where  $\dot{N}_t + N_p = N_t$ ,  $N_p$  is the number of photo-polymerized diacetylene chains;  $\rho$  is the polymerization probability. Considering  $\rho$  is proportional to the exposure dose  $E_p = I_p t = n h \nu_p t$ , where  $I_p$  is the exposure intensity,  $n$  is the photon number per unit area. In general,  $I_p$  and  $n$  are position dependent are depicted by  $I_p(r)$  and  $n(r)$ .  $\nu_p$  is the photon frequency ( $h \nu_p$  is the energy of photons,  $h$  is Plank's constant), and  $t$  is the exposure time. Thus, we have:

$$N_p = N_t (1 - e^{-\rho t}) \quad \text{Eq. 2S}$$

where  $a$  is a polymerization coefficient that depends upon the interaction of photons with diacetylene monomers. Since the emission intensity ( $I_e$ ) is directly dependent upon the degree of photopolymerization, we have:

$$I_e = Kh\nu_e N_t \left(1 - e^{-an(r)h\nu_p t}\right) = I_{es} \left(1 - e^{-at_p(r)t}\right) \quad \text{Eq. 3S}$$

where  $\nu_e$  is the emission frequency,  $K$  is a constant which accounts for red-PDA fraction, and  $I_{es} = KN_t h\nu_e$  is the saturated emission intensity.

In Figure 5A of the main text, the emission intensities dependent on exposure time are shown. The red line is the fitting curve satisfies with  $I_e = 1234(1 - e^{-0.087t})$ . We measured the intensity of the incident UV light is  $I_{inc}=15\mu\text{W}/\text{cm}^2$ , so the polymerization coefficient can be approximately derived by  $a = 0.087/I_{inc}=5.8\times 10^3 \text{ cm}^2/\text{J}$ . It is qualitatively validated by the high polymerization efficiency of UV light to polydiacetylene reported by references.<sup>[1,2]</sup> Furthermore, the experimental fitting curve fits well with the theoretical model (Figure 5).

#### References:

1. B. Tieke and G.Wegner, Makrmol.Chem.179, 1639-1642, (1978).
2. R. W. Carpick,D. Y. Sasaki, M. S. Marcus, M. A. Eriksson, A. R. Burns, J. Phys.: Condens. Matter. 16 R679-R697 (2004).
